# Supplementary material
Source: publisher figshare collection journal article supplement (https://gsajournals.figshare.com/ndownloader/files/20076983)
Supplement: Supplementary file 1 [file 20076983]

| **Gene Name** | **Function#** | **%Adults** | **SEM** | **RNAi lethality in WT** | **RNAi lethality in *lin-54* mutants** |
| --- | --- | --- | --- | --- | --- |
| *mom-1* | Wnt production & secretion | 12.98 | 2.84 | No | No |
| *vps-26* | Wnt production & secretion | 6.85 | 2.42 | No | No |
| *vps-29* | Wnt production & secretion | 15.28 | 4.72 | No | No |
| *vps-35* | Wnt production & secretion | 9.27 | 3.06 | No | No |
| *snx-3* | Wnt production & secretion | 15.69 | 3.44 | No | No |
| *mig-14* | Wnt production & secretion | NA | NA | ND* | ND* |
| *mom-2* | Wnt ligand | NA | NA | No | Yes |
| *lin-44* | Wnt ligand | 3.04 | 2.34 | No | No |
| *egl-20* | Wnt ligand | 70.13 | 5.55 | No | No |
| *cwn-1* | Wnt ligand | 12.44 | 4.98 | No | No |
| *cwn-2* | Wnt ligand | 18.33 | 5.58 | No | No |
| *sfrp-1* | Wnt Inhibitor | NA | NA | ND* | ND* |
| *mom-5* | Wnt receptors | NA | NA | No | Yes |
| *cfz-2* | Wnt receptors | 9.33 | 4.39 | No | No |
| *cam-1* | Wnt receptors | 5.37 | 2.39 | No | No |
| *lin-17* | Wnt receptors | NA | NA | Yes | Yes |
| *lin-18* | Wnt receptors | 21.18 | 4.43 | No | No |
| *mig-1* | Wnt receptors | NA | NA | ND* | ND* |
| *mig-5* | Dishevelled | 29.05 | 3.57 | No | No |
| *dsh-1* | Dishevelled | 33.88 | 4.41 | No | No |
| *dsh-2* | Dishevelled | 6.73 | 4.07 | No | No |
| *pry-1* | β Catenin Destruction Complex | 21.93 | 4.6 | No | No |
| *apr-1* | β Catenin Destruction Complex | 34.27 | 6.18 | No | No |
| *lin-23* | β Catenin Destruction Complex | 9.26 | 4.27 | No | No |
| *gsk-3* | β Catenin Destruction Complex | NA | NA | Yes | Yes |
| *kin-19* | β Catenin Destruction Complex | NA | NA | Yes | Yes |
| *axl-1* | β Catenin Destruction Complex | NA | NA | ND* | ND* |
| *mom-4* | Tak | 100 | 0 | No | No |
| *tap-1* | Tab | 40.25 | 6.5 | No | No |
| *lit-1* | Nlk | NA | NA | No | Yes |
| *bar-1* | β Catenin | 7.37 | 2.79 | No | No |
| *hmp-2* | β Catenin | NA | NA | No | Yes |
| *sys-1* | β Catenin | NA | NA | Yes | Yes |
| *wrm-1* | β Catenin | NA | NA | Yes | Yes |
| *unc-37* | Groucho | NA | NA | Yes | Yes |
| *pop-1* | TCF | NA | NA | Yes | Yes |
| *vang-1* | Wnt/PCP member | 51.3 | 4.79 | No | No |
| *prkl-1* | Wnt/PCP member | 48.53 | 6.87 | No | No |
| *fmi-1* | Wnt/PCP member | 42.9 | 5.75 | No | No |
| *hda-1* | Wnt siganling interactors | NA | NA | No | Yes |
| *skn-1* | Wnt siganling interactors | NA | NA | No | Yes |
| *med-1* | Wnt siganling interactors | NA | NA | No | Yes |
| *rho-1* | Wnt siganling interactors | NA | NA | No | Yes |
| *let-502* | Wnt siganling interactors | NA | NA | No | Yes |
| *pal-1* | Wnt siganling interactors | NA | NA | Yes | Yes |

**Table S5: Results of RNAi knock-down of Wnt signaling components**

# Components and function from Sawa and Korswagen, 2013.

*ND – Not Done. RNAi clones were not available in our library so these components were not tested.

NA – Not Applicable.
